# Supplementary material
Source: publisher figshare collection journal article supplement (https://scielo.figshare.com/articles/dataset/_/5816190)
Supplement: Supplementary file 2 [file Table_2.xls]

## Sheet: Table_2
<b>Authors (year) Region</b>	<b></b>	<b>Study design</b>	<b></b>	<b>Sample</b>	<b></b>	<b>Assessment instrument</b>	<b></b>	<b>Diet-related outcomes</b>	<b></b>	<b>Main results</b>
Vieira <em>etal.</em> (2002) [<a href="#B45">45</a>] Southeast		Cross- sectional		185 first-year university students (57% F); aged 18 to 19 Years; Public university.		Questionnaire on eating habits.		Intake frequency of food groups and meals.		57.3% skipped some main meal. 79.5% did not eat one or more foods of the vegetable group; 72.0% consumed vegetables, and 25.0% consumed fruits 5 to 7 times a week. 86.0% consumed sweets/fats frequently. 73.5% consumed alcoholic beverages
Marcondelli <em>etal.</em> (2008) [<a href="#B46">46</a>] Bras&#237;lia (DF)		Cross- sectional		281 university students (health area); (65% F); mean age 22 years; Public university.		Adapted questionnaire with questions about the intake of food groups and eating habits .		Adequacy of intake frequency of food groups.		79.7% had inappropriate diets. Low intake adequacy of milkand dairy products (23.0%), fruits and vegetables (25.0%), and complex carbohydrates (26%); High percentage of individuals (74.0%) with high intake of carbonated beverages and sweets. 83.9% consumed legumes daily. 40.0% consumed alcoholic beverages weekly.
Monteiro <em>etal.</em> (2009) [<a href="#B47">47</a>] Southeast		Cross- sectional		47 female university students (nutrition and nursing programs, first year) (100% F); aged 19 to 27 years; Public university.		FFQ		Food intake frequency and eating habits.		High intake of foods high in simple carbohydrates, sweets, and carbonated beverages. Low intake of fruits, vegetables, and fish. 76.6% would like to change their eating habits. 48.9% were dieting or had already followed some type of diet.
Feitosa <em>etal.</em> (2010) [<a href="#B48">48</a>] Northeast		Cross- sectional		718 university students (50% F); public university.		Semi-quantitative questionnaire.		Intake frequency of food servings and meals.		Low intake of fruits (67.7%) vegetables (84.4%) and inadequate for recommendations. 76.0% consumed legumes frequently. F: had higher intake of deep-fried foods, sausages, cured meats, sweets, and snacks. M: were less concerned about removing visible fat from meats and had higher intake of alcoholic beverages.
Cansian <em>etal.</em> (2012) [<a href="#B49">49</a>] Southeast		Cross- sectional		122 university students (nutrition program); (94% F); mean age 21 years; public university.		Semi-quantitative FFQ.		Intake frequency of fruits and vegetables.		68.9% had >5 meals/day. Low intake of vegetables. Low intake of fruits (only 28.0% had >3 servings/day).
Ramalho <em>et al.</em> (2012) [<a href="#B50">50</a>] North		Cross- sectional		863 university students (62% F); Aged 21 to 30 years (in 45% of the sample); public university.		Questions about weekly intake frequency of some foods.		Regular intake of fruits and vegetables (5 or more times a week).		Low regular intake of fruits and vegetables (14.8%). Low intake frequency of fast foods (less than 2x/week). The factors that contributed to regular fruit and vegetable intake were being in the A/B socioeconomic class, having a domestic partner, practicing physical activity, and having low intake frequency of fast foods.
Sousa <em>et al.</em> (2013) [<a href="#B51">51</a>] Northeast		Cross- sectional		1,084 university students (55% F); mean age 23.5 years; public university.		ISAQ-A questionnaire (Student Health and Quality of Life Indicators) (MONISA Study - 10-year follow-up).		Inadequate intake of fruits and vegetables (up to 4 days/ week). Excessive intake of alcoholic beverages (consume in the last 30 days five or more shots of alcoholic beverages on the same occasion).		81.2% had inadequate fruit intake and 57.0% had inadequate vegetable intake. M had lower fruit and vegetable intake than women. Males were more likely to have excessive intake of alcoholic beverages.
Pereira-Santos <em>et ai</em> (2016) [<a href="#B52">52</a>] Northeast		Cross- sectional		125 university students (Nutrition program); (88% F); mean age 22 years; Public university.		FFQ		FFQ transformed into dietary patterns.		Four dietary patterns were identified: Traditional: roots/tubers, legumes, dairy products, meats and eggs, fruit/ natural juice and vegetables. Exam day: breads/cereals, sausages, and artificial beverages. End of semester: candy/sugars and snacks. Anxiety: coffee/tea and fats; 38% had inappropriate diets (patterns 2, 3, and 4), characterized by low food variety, and low intake of high-fiber, high…
