# Supplementary material
Source: publisher figshare collection journal article supplement (https://scielo.figshare.com/articles/dataset/_/5816190)
Supplement: Supplementary file 3 [file Table_3.xls]

## Sheet: Table_3
<b>Results</b>	<b></b>	<b>Article frequency (%)</b>
		F (n=29)		B (n=8)
Skipping breakfast [13,29,34,36,38-41,45]		24.1		12.5
Having breakfast daily [17,26,27,30]		13.8		-
Habitually snacking or skipping meals [13,29,40,45]		10.3		12.5
Low intake of fruits and vegetables [13,15,17,18,20,23,26,27,29,30-36,38-41,45-51]		69.0		87.5
Low intake of fish [15,17,26,27,29,33,34,41,47]		27.6		12.5
High intake of carbonated beverages [13,17,23,25,29,34,40,46,47]		24.1		25.0
High intake of alcoholic beverages [15,28,34,45,46,48,51]		10.3		50.0
High intake of fast foods, snacks, and sweets [15,18,20,33,34,36,39,41,46,47,50]		27.6		62.5
